# Supplementary material
Source: publisher figshare collection journal article supplement (https://frontiersin.figshare.com/ndownloader/files/13122263)
Supplement: Supplementary file [file 13122263]

## Appendix: proofs of Propositions

### Proof of Proposition 1

It is immediately implied by equation (4).

### Proof of Proposition 2

$$\begin{aligned} V_x(e) &= - \int_m l (a^*(m, e) - x)^2 dG_e(m | x) - \frac{e^2}{2} \\ &= - \int_m l \left( \frac{p}{e+p}(\theta - x) + \frac{e}{e+p}(m - x) \right)^2 dG_e(m | x) - \frac{e^2}{2} \end{aligned}$$

Since  $m | x \sim \mathcal{N}(x, \frac{1}{e})$  (see equation (3)), the expected payoff can then be rewritten as:

$$\begin{aligned} V_x(e) &= -l \left[ \left( \frac{p}{e+p} \right)^2 (\theta - x)^2 + \frac{2pe}{(e+p)^2} (\theta - x) \mathbb{E}[m - x] + \left( \frac{e}{e+p} \right)^2 \mathbb{E}[m - x]^2 \right] - \frac{e^2}{2} \\ &= -l \left( \frac{e + p^2(x - \theta)^2}{(e+p)^2} \right) - \frac{e^2}{2}. \end{aligned}$$

Taking derivatives, we get:

$$\frac{\partial V_x(e)}{\partial e} = l \frac{e + p(2p(x - \theta)^2 - 1)}{(e+p)^3} - e$$

Suppose that  $(x - \theta)^2 > \frac{1}{2p}$ . It means that  $\frac{\partial V_x(e)}{\partial e} \Big|_{e=0} > 0$ . Since  $\lim_{e \rightarrow +\infty} \frac{\partial V_x(e)}{\partial e} = -\infty$ , by continuity there is at least one interior maximum  $e^* (> 0)$  such that:

$$\frac{\partial V_x(e)}{\partial e} \Big|_{e^*} = 0 \quad \Leftrightarrow \quad l \frac{e^* + p(2p(x - \theta)^2 - 1)}{(e^* + p)^3} = e^*$$

We next prove that the maximum is unique. Taking derivatives once again:

$$\frac{\partial^2 V_x(e)}{\partial e^2} = l \frac{e + p - 3(e + p(2p(x - \theta)^2 - 1))}{(e+p)^4} - 1$$

Substituting  $e^*$  we therefore get:

$$\frac{\partial^2 V_x(e)}{\partial e^2} \Big|_{e^*} = l \frac{1}{(e^* + p)^3} - \frac{3e^*}{e^* + p} - 1$$

So, if there are two values  $e_2^* > e_1^*$  such that  $\frac{\partial V_x(e)}{\partial e} \Big|_{e_2^*} = 0$  and  $\frac{\partial V_x(e)}{\partial e} \Big|_{e_1^*} = 0$ , then:

$$\frac{\partial^2 V_x(e)}{\partial e^2} \Big|_{e_2^*} = l \frac{1}{(e_2^* + p)^3} - \frac{3e_2^*}{e_2^* + p} - 1 < \frac{\partial^2 V_x(e)}{\partial e^2} \Big|_{e_1^*} = l \frac{1}{(e_1^* + p)^3} - \frac{3e_1^*}{e_1^* + p} - 1$$

In words, the second derivative at  $e_2^*$  must be smaller than the second derivative at  $e_1^*$ . However,  $\left. \frac{\partial V_x(e)}{\partial e} \right|_{e=0} > 0$  means that  $e_1^*$  must be a local maximum, that is,  $\left. \frac{\partial^2 V_x(e)}{\partial e^2} \right|_{e_1^*} < 0$ , which in turn implies that  $e_2^*$  cannot be a local minimum and therefore that the interior equilibrium  $e^*$  is unique. Overall, for all  $(x - \theta)^2 > \frac{1}{2p}$ , the optimal level of attention is uniquely defined and given by the first-order condition, equation (6).

Consider now the case  $(x - \theta)^2 = \frac{1}{2p}$ . The first-order condition becomes:

$$\frac{le^*}{(e^* + p)^3} = e^*$$

This equation has two solutions  $e_1^{**} = 0$  and  $e_2^{**} = l^{1/3} - p$ . It is easy to check that  $\left. \frac{\partial V_x(e)}{\partial e} \right|_{e=e_2^{**}} < 0$  for all  $e > e_2^{**}$ . There are two cases:

- If  $l^{1/3} - p < 0$ , then the only solution to the problem is  $e_1^{**} = 0 = \lim_{(x-\theta)^2 \rightarrow \frac{1}{2p}} e_1^*$  and the function  $V_x(e)$  is always decreasing in  $e$ . For all  $(x - \theta)^2 < \frac{1}{2p}$ ,  $\left. \frac{\partial V_x(e)}{\partial e} \right|_{e=0} < 0$ . Hence the solution of the problem is the corner solution  $e^* = 0$  for all  $(x - \theta)^2 < \frac{1}{2p}$ .

- If  $l^{1/3} - p > 0$ , the interior solution of the problem is  $e_2^{**} = \lim_{(x-\theta)^2 \rightarrow \frac{1}{2p}} e_1^*$ . Notice that  $V_x(e)$  is decreasing in  $(x - \theta)^2$  for all  $e$ . Also,  $\left. \frac{\partial V_x(e)}{\partial e} \right|_{e=e_2^{**}} > 0$  is increasing in  $(x - \theta)^2$  for all  $e$ . Given these properties, for all  $(x - \theta)^2 < \frac{1}{2p}$ , there are at most two solutions:  $\hat{e}_1 = 0$  and the solution  $\hat{e}_2$  to  $\left. \frac{\partial V_x(e)}{\partial e} \right|_{e=\hat{e}_2} = 0$ . Last notice that:

$$\frac{\partial V_x(0) - V_x(\hat{e}_2)}{\partial (x - \theta)^2} = -l + l \frac{p^2}{(\hat{e}_2 + p)^2} < 0$$

Furthermore,  $\lim_{(x-\theta)^2 \rightarrow 0} V_x(0) = 0$  and  $\lim_{(x-\theta)^2 \rightarrow 0} V_x(\hat{e}_2) < 0$ . Therefore, there exists a cutoff  $k^* (< \frac{1}{2p})$  such that the solution is  $\hat{e}_1 = 0$  for all  $(x - \theta)^2 < k^*$ . The cutoff  $k^*$  is solution of  $V_x(0) = V_x(\hat{e}_2)$ , that is it solves

$$\left( \frac{p^2 k^*}{p^2} \right) = \left( \frac{\hat{e}_2 + p^2 k^*}{(\hat{e}_2 + p)^2} \right) - \frac{\hat{e}_2^2}{2}$$

where  $\hat{e}_2$  solves

$$l \frac{\hat{e}_2 + p(2pk^* - 1)}{(\hat{e}_2 + p)^3} = \hat{e}_2$$

To sum up:

- If  $l^{1/3} - p < 0$ , there exist two values  $\underline{x} = \theta - \frac{1}{\sqrt{2p}}$  and  $\bar{x} = \theta + \frac{1}{\sqrt{2p}}$  such that the optimal attention  $e^*$  solves equation (6) for all  $x \notin [\underline{x}, \bar{x}]$ , that is, whenever  $(x - \theta)^2 > \frac{1}{2p}$  and the optimal attention is  $e^* = 0$  for all  $x \in [\underline{x}, \bar{x}]$ , that is, whenever  $(x - \theta)^2 \leq \frac{1}{2p}$ .

- If  $l^{1/3} - p \geq 0$ , there exist two values  $\underline{x} = \theta - \sqrt{k^*}$  and  $\bar{x} = \theta + \sqrt{k^*}$  such that the optimal attention  $e^*$  solves equation (6) for all  $x \notin [\underline{x}, \bar{x}]$ , that is, whenever  $(x - \theta)^2 > k^*$  and the optimal attention is  $e^* = 0$  for all  $x \in [\underline{x}, \bar{x}]$ , that is, whenever  $(x - \theta)^2 \leq k^*$ .

For the case where optimal attention is strictly positive (and given by (6)), a straightforward differentiation of the first-order condition yields:

$$\left. \frac{\partial^2 V_x(e)}{\partial e^2} \right|_{e^*} \frac{de^*}{d(x - \theta)^2} + \left. \frac{\partial^2 V_x(e)}{\partial e \partial (x - \theta)^2} \right|_{e^*} = 0 \Leftrightarrow \frac{de^*}{d(x - \theta)^2} \propto \left. \frac{\partial^2 V_x(e)}{\partial e \partial (x - \theta)^2} \right|_{e^*} > 0$$

which means that in the interior equilibrium, attention increases as  $x$  moves farther away from  $\theta$ . This is reflected in Figure 2a.

Finally, from equation (5), it is immediate that for all  $x > \bar{x}$ , as  $x$  increases,  $e^*$  increases so  $E[a^* | x]$  is closer to  $x$ . Similarly, for all  $x < \bar{x}$ , as  $x$  decreases,  $e^*$  increases so  $E[a^* | x]$  is again closer to  $x$ . This is reflected in Figure 2b.

### Proof of Proposition 3

Differentiation of the first-order condition in the interior optimum (6) yields:

$$\left. \frac{\partial^2 V_x(e)}{\partial e^2} \right|_{e^*} \frac{de^*}{dl} + \left. \frac{\partial^2 V_x(e)}{\partial e \partial l} \right|_{e^*} = 0 \Leftrightarrow \frac{de^*}{dl} \propto \left. \frac{\partial^2 V_x(e)}{\partial e \partial l} \right|_{e^*} > 0$$

### Proof of Proposition 4

Applying the envelope theorem, we can differentiate EV (the expected payoff before the realization of the event) with respect to  $p$ . We obtain:

$$\frac{dEV}{dp} = \frac{\partial EV}{\partial p} = l \frac{1}{(e^* + p)^2} > 0$$

### Proof of claims in Section 3.2

*Working memory dysfunction.* Differentiation of the first-order condition in the interior optimum and given a cost of attention  $c(e) = \alpha \frac{e^2}{2}$  yields:

$$\left. \frac{\partial^2 V_x(e)}{\partial e^2} \right|_{e^*} \frac{de^*}{d\alpha} + \left. \frac{\partial^2 V_x(e)}{\partial e \partial \alpha} \right|_{e^*} = 0 \Leftrightarrow \frac{de^*}{d\alpha} \propto \left. \frac{\partial^2 V_x(e)}{\partial e \partial \alpha} \right|_{e^*} < 0$$

*Episodic memory dysfunction.* For an encoding probability  $q$ , the expected payoff becomes:

$$V_x(e) = -l \left( q \frac{e + p^2 (x - \theta)^2}{(e + p)^2} + (1 - q)(x - \theta)^2 \right) - \frac{e^2}{2}.$$

Differentiating again the first-order condition in the interior optimum yields:

$$\left. \frac{\partial^2 V_x(e)}{\partial e^2} \right|_{e^*} \frac{de^*}{dq} + \left. \frac{\partial^2 V_x(e)}{\partial e \partial q} \right|_{e^*} = 0 \Leftrightarrow \frac{de^*}{dq} \propto \left. \frac{\partial^2 V_x(e)}{\partial e \partial q} \right|_{e^*} > 0$$
